# Supplementary material
Source: Springer Nature journal article supplement (https://www.springermedizin.de/resource/supplementary/12876_2011_744_MOESM3_ESM.pdf/9437762)
Supplement: MOESM3 [file 9437762]

292 eligible patients with IWL

2 refused to participate

290 patients with IWL included  
(228 fulfilled 1st criterion  
62 fulfilled 2nd criterion)  
All 290 had work-up for IWL etiology

290 patients had hemoglobin,  
MCV, RDW, ferritin measured  
236 had serum iron measured

11 patients without endoscopic studies and  
lost to follow-up

- 4 diagnosed with cancer (other than  
gastrointestinal) (2 histopathology, 2  
CT & tumoral markers)
- 7 without cancer (2 hyperthyroidism, 4  
depression, 1 polyarteritis nodosa)

279 had reference standard  
(bidirectional endoscopy and/or 6 month follow-up)

20 had only endoscopy  
- 2 gastric cancers

128 had both endoscopy  
and 6 months follow-up

- 6 gastric cancers  
12 colorectal cancers
- 1 ileal cancer

131 had only 6 months follow-up  
- 1 colon cancer
